# Supplementary material for: Long-wave infrared photothermoelectric detectors with resonant nanophotonics
Source: Royal Society of Chemistry journal article supplement (doi:10.1039/d4tc02504k), 2024-01-01
Supplement: d4tc02504k1.pdf [file d4tc02504k1.pdf]

Supporting Information

## **Long-wave infrared photothermoelectric detectors with resonant nanophotonics**

Yurong Zhang<sup>1</sup>, Jiamin Jiang<sup>1</sup>, Zhiheng Zhang<sup>1</sup>, He Yu<sup>1\*</sup>, Yunlu Lian<sup>1</sup>, Chao Han<sup>1</sup>,  
Xianchao Liu<sup>2</sup>, Jiayue Han<sup>1</sup>, Hongxi Zhou<sup>1</sup>, Xiang Dong<sup>1\*</sup>, Jun Gou<sup>1\*</sup>, Zhiming Wu<sup>1</sup>,  
Jun Wang<sup>1\*</sup>

<sup>1</sup>State Key Laboratory of Electronic Thin Films and Integrated Devices, University of  
Electronic Science and Technology of China, Chengdu 610054, China;

<sup>2</sup> Southwest Institute of Technical Physics, Sichuan, Chengdu 610041, China

E-mail: [wjun@uestc.edu.cn](mailto:wjun@uestc.edu.cn) (J. Wang)

[yuhe@uestc.edu.cn](mailto:yuhe@uestc.edu.cn) (H. Yu)

[goujun@uestc.edu.cn](mailto:goujun@uestc.edu.cn) (J. Gou)

[dongxiang@uestc.edu.cn](mailto:dongxiang@uestc.edu.cn) (X. Dong)

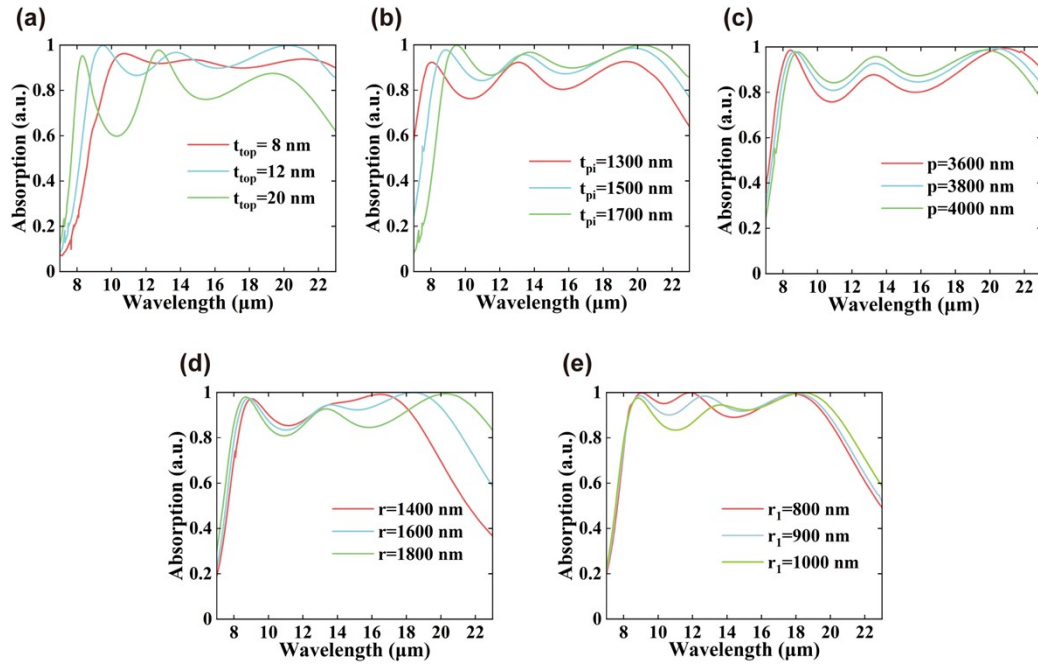

**Figure S1.** Schematic parameters optimization of perfect absorber. (a) Absorption curve of top metal layers with different thicknesses. (b) Absorption curve of PI with different thicknesses. (c) Absorption curve of discs with different spacing sizes. (d) Absorption curve for different large disc radii. (e) Absorption curve for different small disc radii.

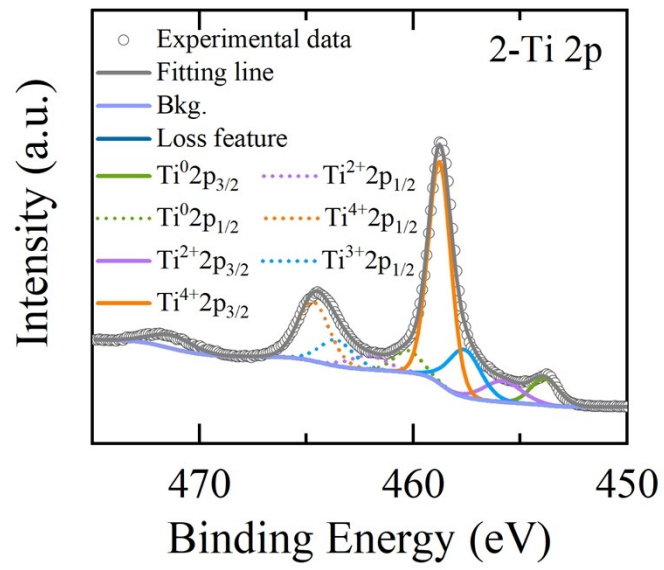

**Figure S2.** XPS analysis of the metasurface.

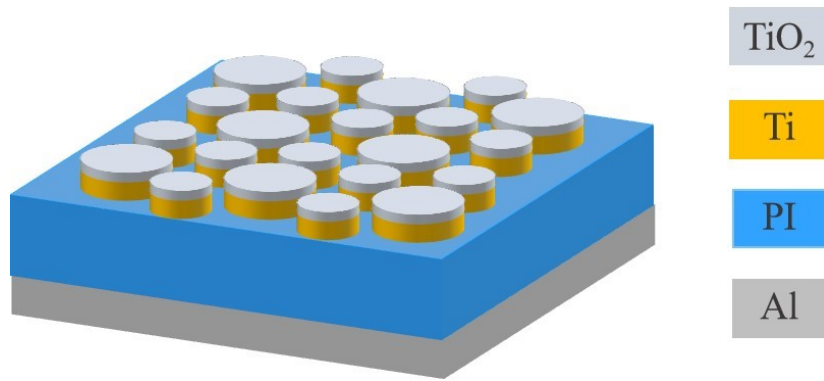

**Figure S3.** Revised theoretical model according to the experimental result.

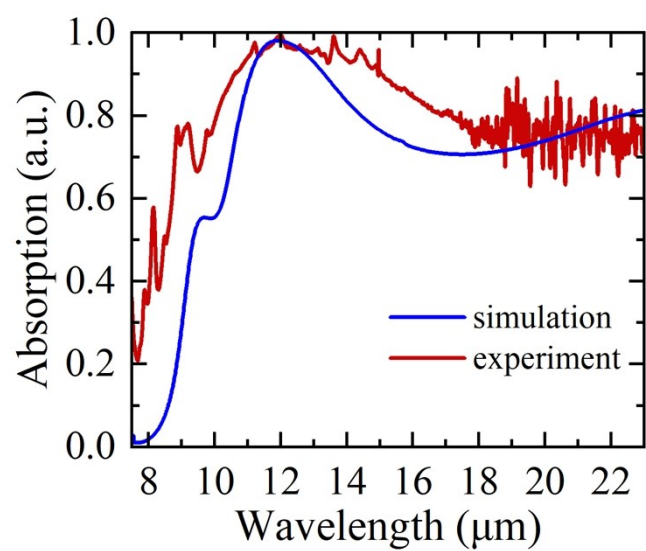

**Figure S4.** Comparison between simulated and experimental absorption characterization.

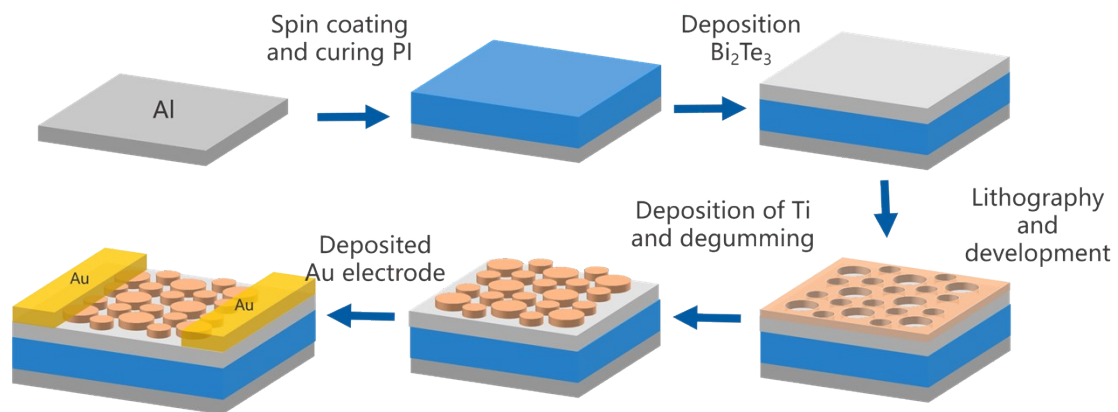

**Figure S5.** Device Fabrication Process Schematic.

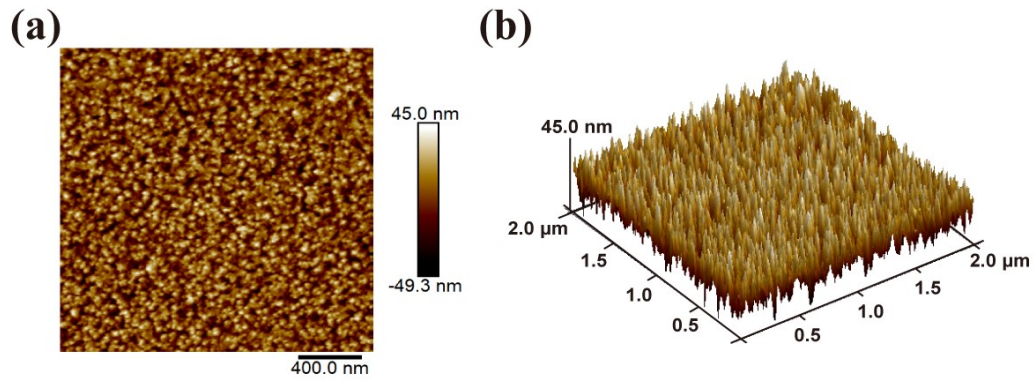

**Figure S6.** AFM characterization of  $\text{Bi}_2\text{Te}_3$  film: (a) 2D view, (b) 3D view.

**Table S1.** Summary of Seebeck coefficient of heat-sensitive materials.

| Temperature<br>(°C) | Resistivity<br>( $\mu$ Ohm*m) | Rel. Seebeck<br>( $\mu$ V/K) | Wire<br>seebeck<br>( $\mu$ V/K) | Seebeck<br>coefficient<br>( $\mu$ V/K) |
|---------------------|-------------------------------|------------------------------|---------------------------------|----------------------------------------|
| 3.13E+01            | 1.61E+03                      | 1.59E+02                     | -5.39E+00                       | 1.53E+02                               |



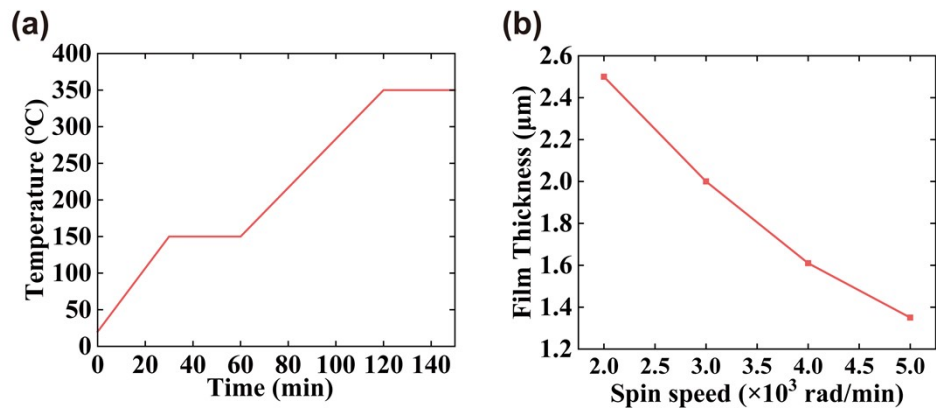

**Figure S7.** Heating process and thickness analysis of the polyimide (PI) film. (a) Temperature rise curve of the high temperature oven. (b) The relationship between thickness of PI and rotational speed.

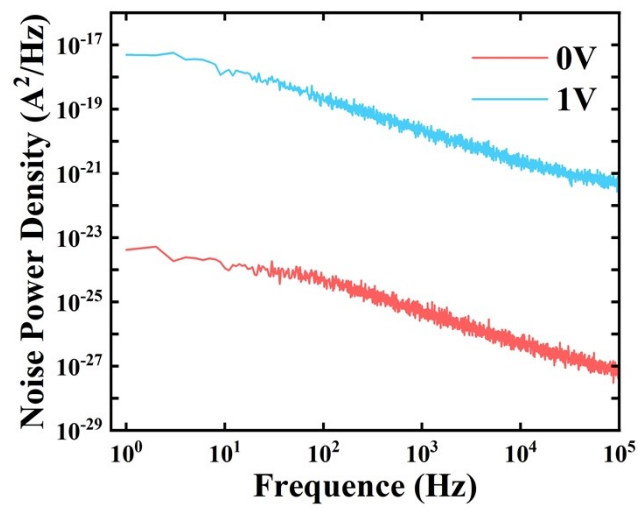

**Figure S8.** Noise spectral of the device at different bias voltages.

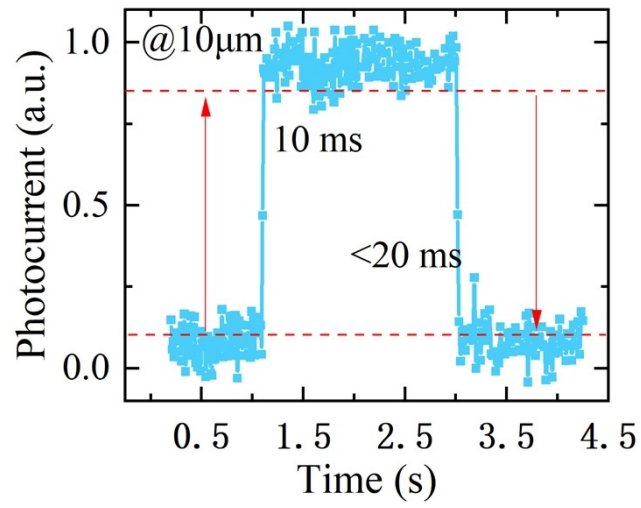

**Figure S9.** The time-resolved photocurrent of the device under 10  $\mu\text{m}$  stimulation for analyzing its response speed.

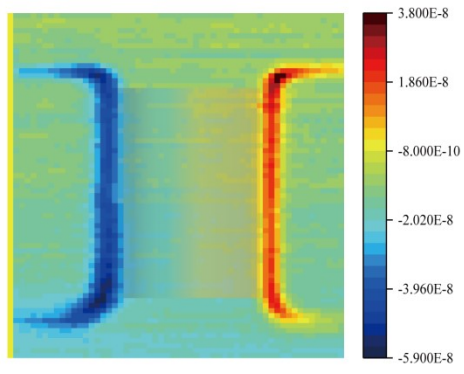

**Figure S10.** Photocurrent mapping of the device.
